# Supplementary material for: Species Composition and Seasonal Abundance of Predatory Mites (Acari: Phytoseiidae) Inhabiting Aesculus hippocastanum (Sapindaceae)
Source: MDPI journal article supplement (doi:10.3390/f14050942), 2023-05-03
Supplement: s1 [file s1]

## Supplementary material

**Table S1.** Concentrations of air pollutants (weight per m<sup>3</sup> of air) in *Aesculus hippocastanum* sampling sites. Symbols in brackets indicate weight units. Data representing five-year averages of 2009-2013 were obtained from Geographical Information System of South Bohemia [19].

| Site name                       | As<br>(ng) | Cd<br>(ng) | Pb<br>(ng) | Ni<br>(ng) | SO <sub>2</sub> (24h)<br>(µg) | PM10 <sup>1</sup> (24h)<br>(µg) | PM10 <sup>1</sup><br>(µg) | PM2.5 <sup>2</sup><br>(µg) | C <sub>6</sub> H <sub>6</sub><br>(µg) | C <sub>20</sub> H <sub>12</sub><br>(ng) | NO <sub>2</sub><br>(µg) |
|---------------------------------|------------|------------|------------|------------|-------------------------------|---------------------------------|---------------------------|----------------------------|---------------------------------------|-----------------------------------------|-------------------------|
| City centre                     | 2.49       | 0.32       | 6.1        | 1.1        | 21.4                          | 41.6                            | 23                        | 17.9                       | 1.4                                   | 1.38                                    | 15.7                    |
| Šumava and Máj estate           | 1.89       | 0.32       | 6.2        | 1.2        | 20.3                          | 42.5                            | 23.4                      | 18.2                       | 1.3                                   | 1.31                                    | 15.4                    |
| Vltava estate                   | 2.24       | 0.34       | 6.3        | 1.2        | 20.1                          | 43.7                            | 23.9                      | 18.3                       | 1.4                                   | 1.33                                    | 20.5                    |
| Třebotovice and Kaliště village | 1.85       | 0.4        | 3.6        | 1.1        | 21.5                          | 31.4                            | 17.1                      | 13.6                       | 0.9                                   | 0.42                                    | 10.7                    |
| Rožnov estate                   | 1.72       | 0.26       | 5.9        | 0.7        | 22.2                          | 39.1                            | 21.7                      | 17.4                       | 1.2                                   | 1.41                                    | 17                      |
| Pražské předměstí estate        | 2.52       | 0.33       | 6.2        | 1.1        | 20.7                          | 43.2                            | 23.6                      | 18.2                       | 1.4                                   | 1.33                                    | 20.1                    |
| Stromovka park                  | 1.77       | 0.28       | 5.9        | 0.9        | 20.6                          | 40.1                            | 22.1                      | 17.3                       | 1.3                                   | 1.24                                    | 16.8                    |
| Nádražní street                 | 2.93       | 0.32       | 5.9        | 1.1        | 23.7                          | 40.5                            | 22.5                      | 17.7                       | 1.3                                   | 1.36                                    | 20.5                    |

<sup>1</sup> Coarse particulate matter; particles with a diameter of 10 µm or less.

<sup>2</sup> Fine particulate matter; particles with a diameter of 2.5 µm or less.

**Table S2.** Air pollution index for individual atmospheric pollutants and overall index of air pollution for *Aesculus hippocastanum* sampling sites. Individual indexes were calculated from measurements shown in Table S1 and concentration limits indicated in brackets using equation (3). The concentration limits are from Geographical Information System of South Bohemia [19].

| Site name                       | As<br>(6) | Cd<br>(5) | Pb<br>(500) | Ni<br>(20) | SO <sub>2</sub> (24h)<br>(125) | PM10 <sup>1</sup> (24h)<br>(50) | PM10 <sup>1</sup><br>(40) | PM2.5 <sup>2</sup><br>(25) | C <sub>6</sub> H <sub>6</sub><br>(5) | C <sub>20</sub> H <sub>12</sub><br>(1) | NO <sub>2</sub><br>(40) | Overall<br>index <sup>3</sup> |
|---------------------------------|-----------|-----------|-------------|------------|--------------------------------|---------------------------------|---------------------------|----------------------------|--------------------------------------|----------------------------------------|-------------------------|-------------------------------|
| City centre                     | 0.415     | 0.064     | 0.012       | 0.055      | 0.171                          | 0.832                           | 0.575                     | 0.716                      | 0.280                                | 1.380                                  | 0.393                   | 4.893                         |
| Šumava and Máj estate           | 0.315     | 0.064     | 0.012       | 0.060      | 0.162                          | 0.850                           | 0.585                     | 0.728                      | 0.260                                | 1.310                                  | 0.385                   | 4.732                         |
| Vltava estate                   | 0.373     | 0.068     | 0.013       | 0.060      | 0.161                          | 0.874                           | 0.598                     | 0.732                      | 0.280                                | 1.330                                  | 0.513                   | 5.001                         |
| Třebotovice and Kaliště village | 0.308     | 0.080     | 0.007       | 0.055      | 0.172                          | 0.628                           | 0.428                     | 0.544                      | 0.180                                | 0.420                                  | 0.268                   | 3.090                         |
| Rožnov estate                   | 0.287     | 0.052     | 0.012       | 0.035      | 0.178                          | 0.782                           | 0.543                     | 0.696                      | 0.240                                | 1.410                                  | 0.425                   | 4.659                         |
| Pražské předměstí estate        | 0.420     | 0.066     | 0.012       | 0.055      | 0.166                          | 0.864                           | 0.590                     | 0.728                      | 0.280                                | 1.330                                  | 0.503                   | 5.014                         |
| Stromovka park                  | 0.295     | 0.056     | 0.012       | 0.045      | 0.165                          | 0.802                           | 0.553                     | 0.692                      | 0.260                                | 1.240                                  | 0.420                   | 4.539                         |
| Nádražní street                 | 0.488     | 0.064     | 0.012       | 0.055      | 0.190                          | 0.810                           | 0.563                     | 0.708                      | 0.260                                | 1.360                                  | 0.513                   | 5.022                         |

<sup>1</sup> Coarse particulate matter; particles with a diameter of 10 µm or less.

<sup>2</sup> Fine particulate matter; particles with a diameter of 2.5 µm or less.

<sup>3</sup> For calculation see equation (2).
